# Supplementary material for: The proteome of Nicotiana benthamiana is shaped by extensive protein processing
Source: PubMed Central journal article supplement (PMC11494411; doi:10.1111/nph.19891), 2024-06-09
Supplement: NPH-243-1034-s001.pdf [file NPH-243-1034-s001.pdf]

3 x (EV; FLAG-RFP-*NbSCPL25*-His-GFP)

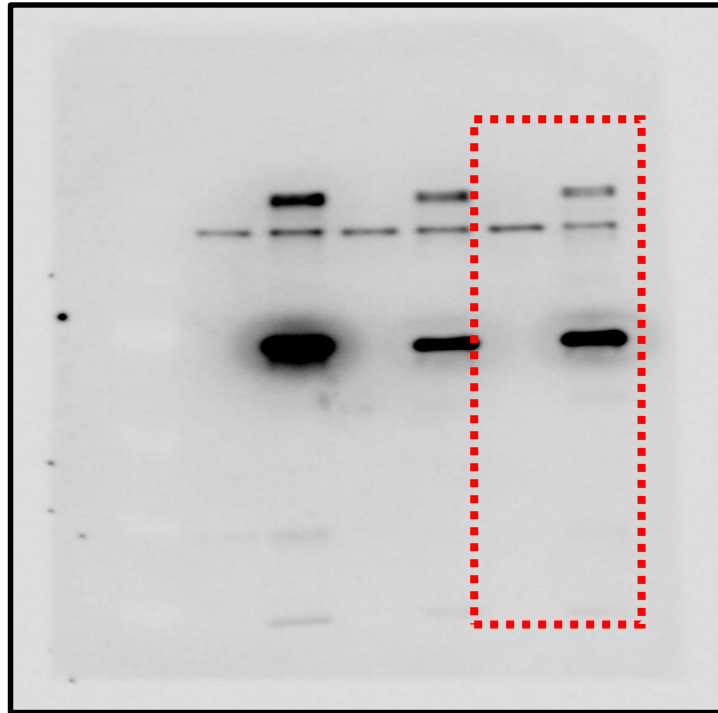

*Anti-FLAG*

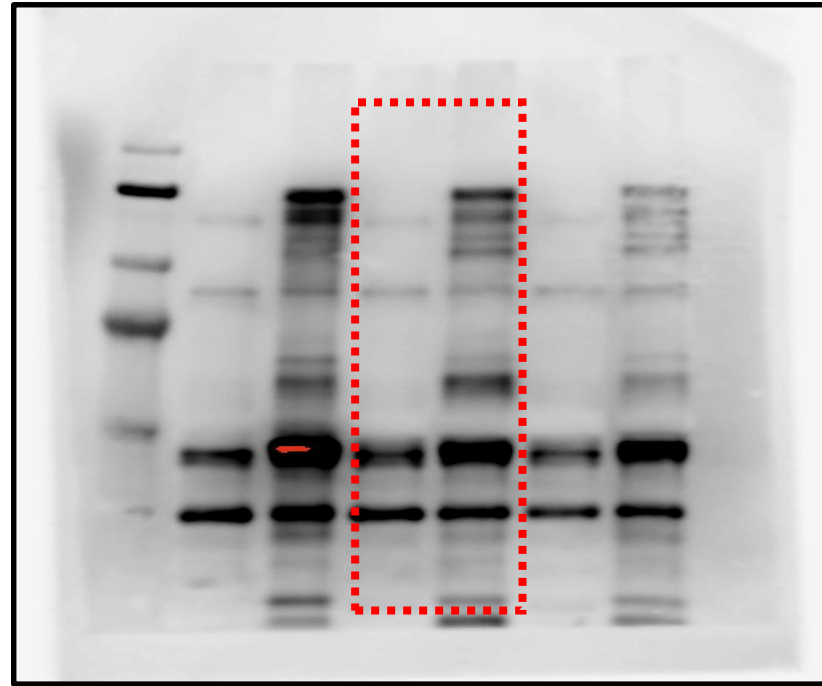

*Anti-His*

4 x (EV; FLAG-RFP-*NbSCLP20b*-His-GFP)

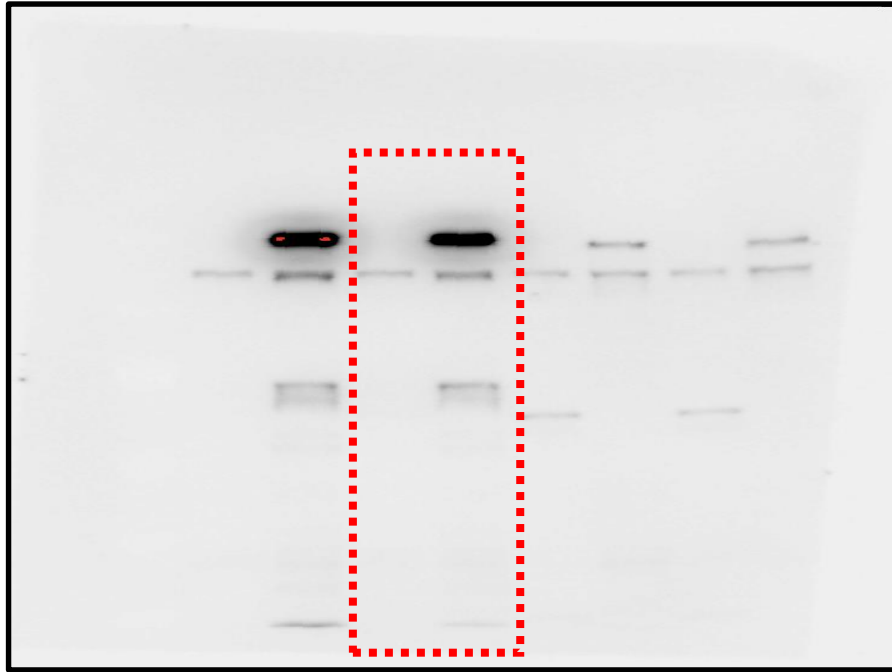

*Anti-FLAG*

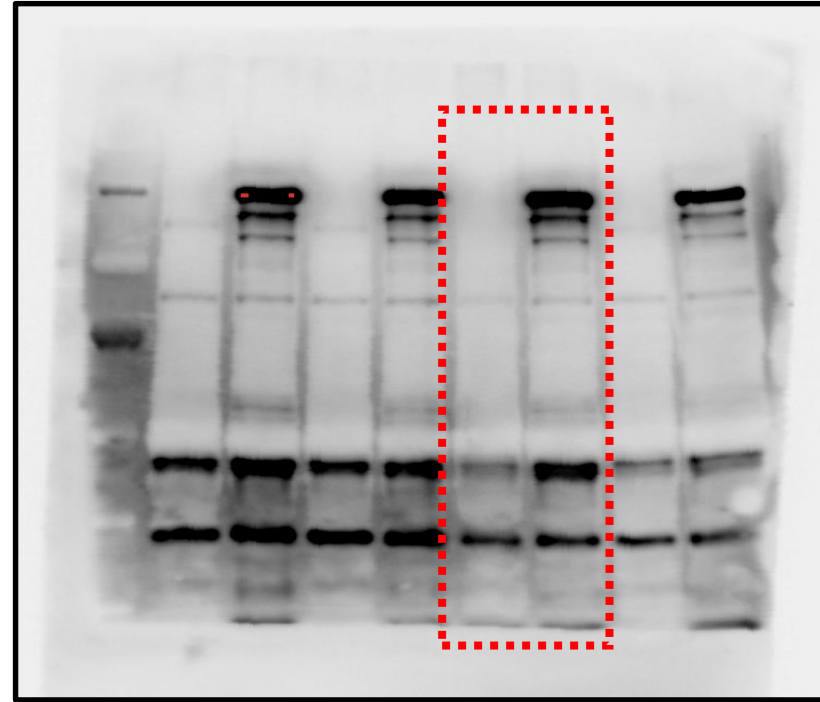

*Anti-His*

4 x (EV; FLAG-RFP-*NbEDA2*-His-GFP)

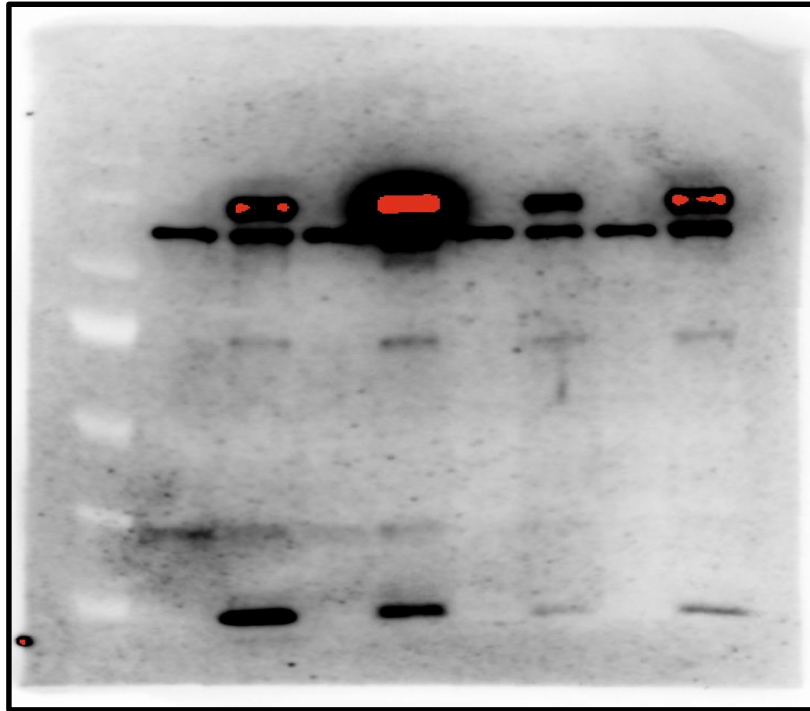

*Anti-FLAG*

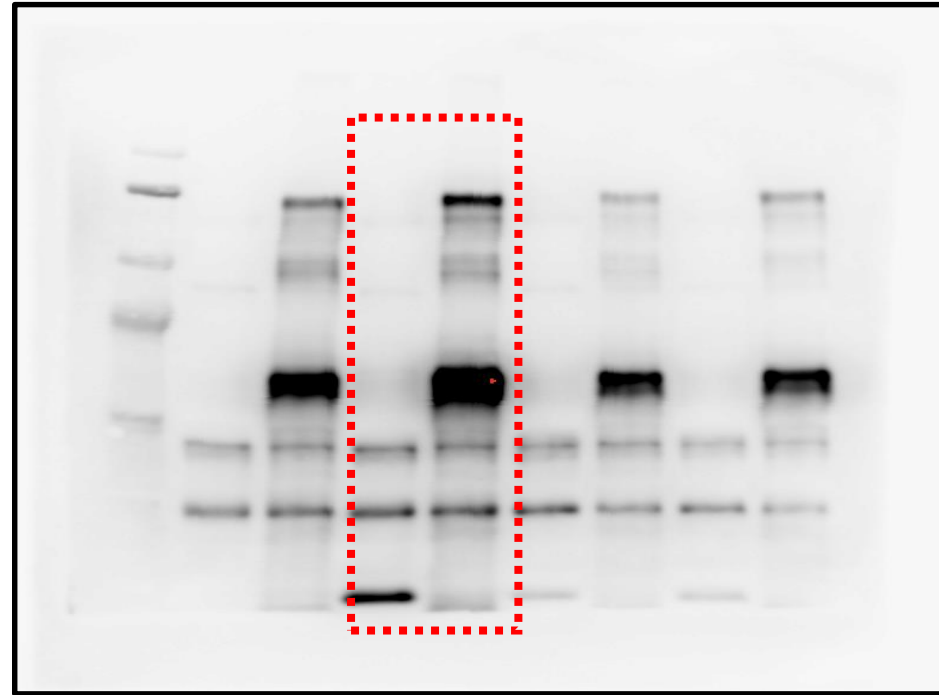

*Anti-His*

3 x (EV; FLAG-RFP-*NbGMCO*-His-GFP)

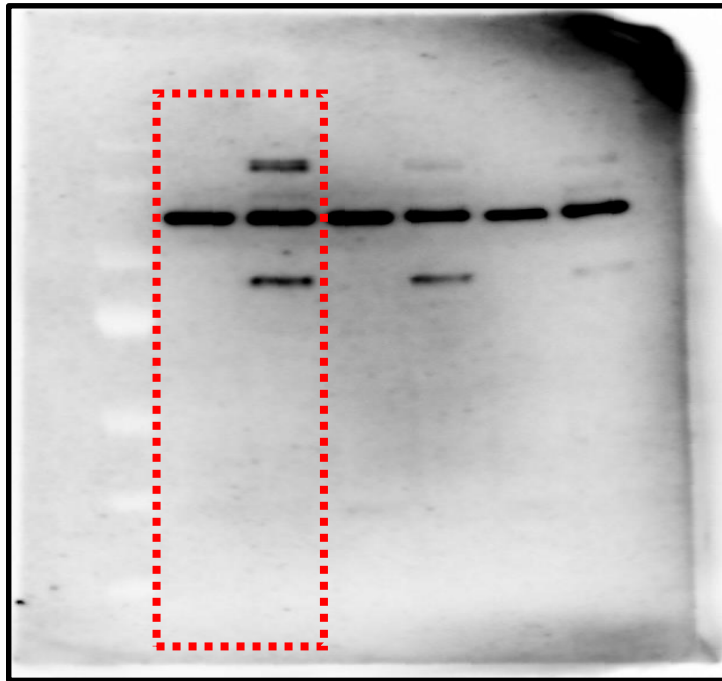

*Anti-FLAG*

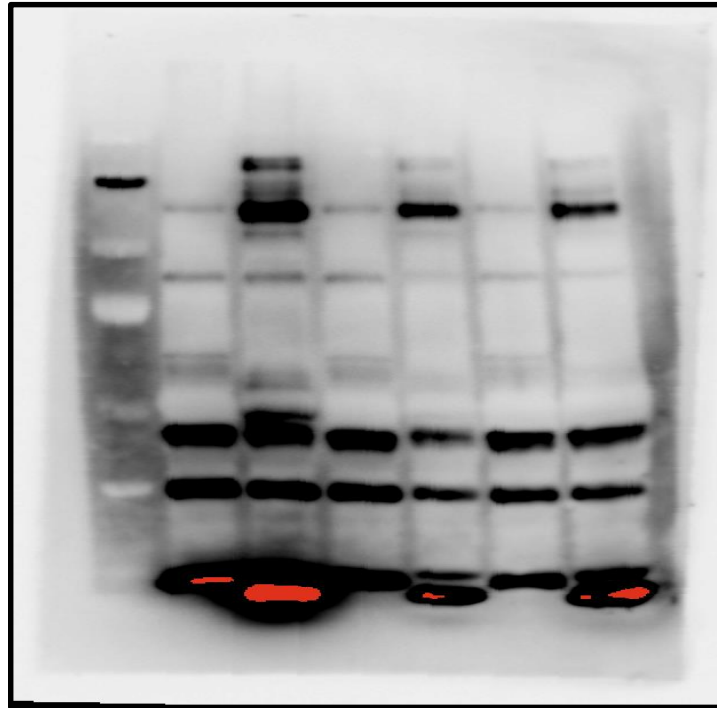

*Anti-His*

3 x (EV; 2 x FLAG-RFP-*NbGMCO*-His-GFP)

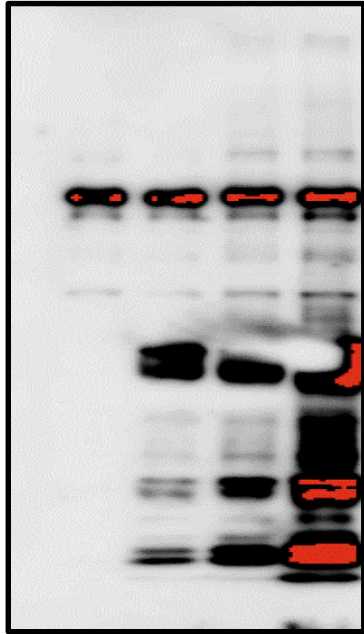

*Anti-FLAG*

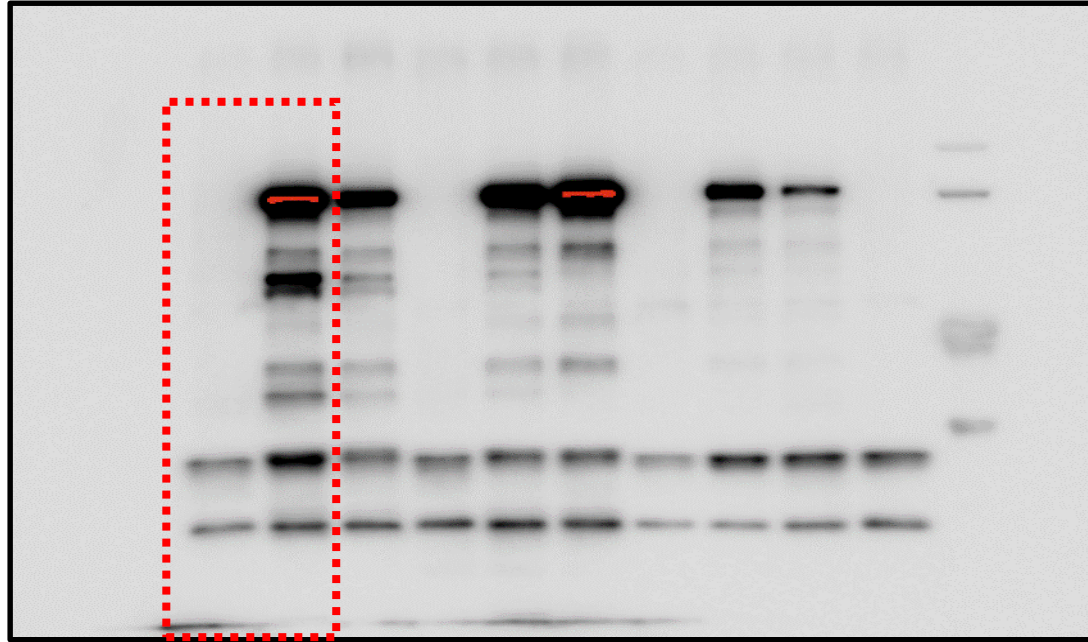

*Anti-His*
