# Supplementary material for: The proteome of Nicotiana benthamiana is shaped by extensive protein processing
Source: PubMed Central journal article supplement (PMC11494411; doi:10.1111/nph.19891), 2024-06-09
Supplement: NPH-243-1034-s004.pdf [file NPH-243-1034-s004.pdf]

**New Phytologist Supporting Information**

**Article title:** *The proteome of Nicotiana benthamiana is shaped by extensive protein processing*

**Authors:** Kaijie Zheng, Joy C. Lyu, Emma L. Thomas, Mariana Schuster, Nattapong Sanguankiattichai, Sabrina Ninck, Farnusch Kaschani, Markus Kaiser, Renier A. L. van der Hoorn

**Article acceptance date:** 29 April 2024

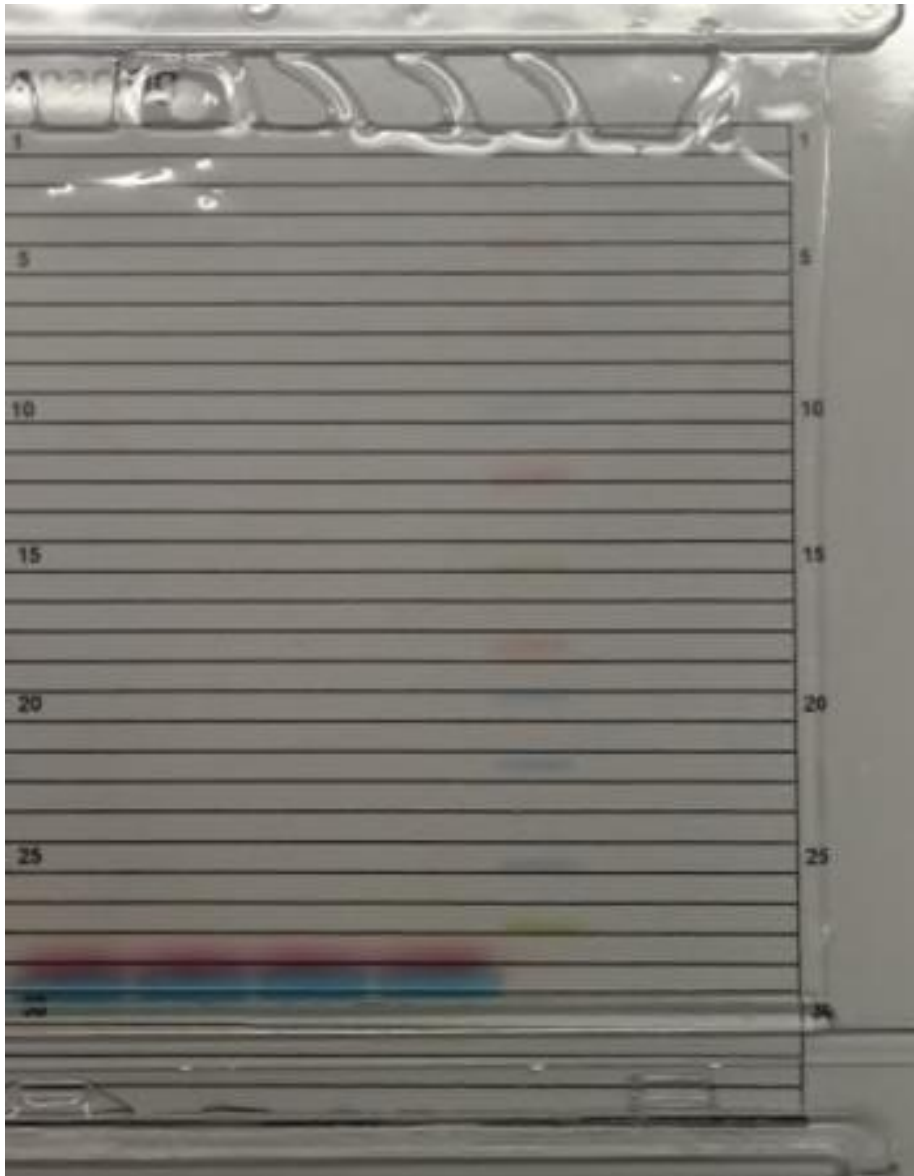

**Figure S1** Image of 4-12% gradient SDS PAGE used for PROTOMAP.

Gel slices were excised in 2.5 mm bands guided by gridlines in one cut. Next, the four biological replicate lanes were separated. The prestained MW marker is just visible.

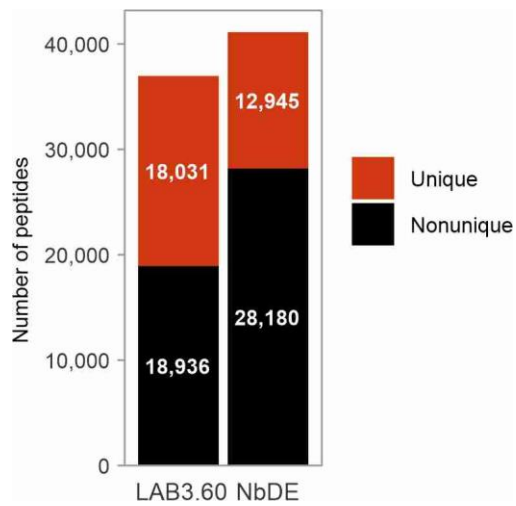

**Figure S2** Number of annotated (unique) tryptic peptides to LAB3.60 vs NbDE proteomes. Spectra were annotated to the tryptic proteomes of the LAB3.60 and NbDE annotations and the number of non-unique and unique peptides were counted.

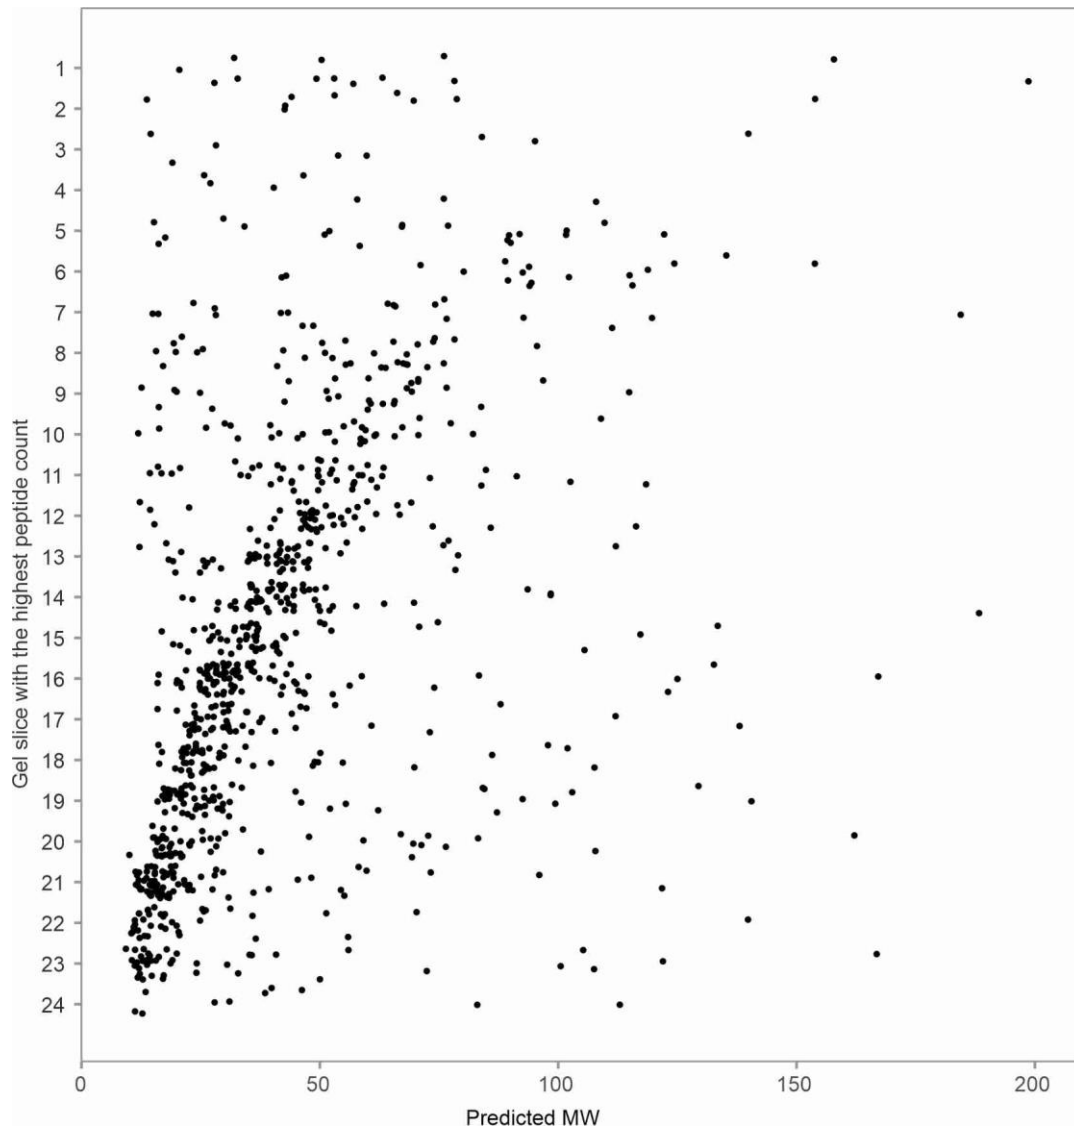

**Figure S3** Correlation between predicted and apparent MW for proteins detected with a single peptide. Slices with the highest count were taken if a single peptide was detected in multiple slices.

**Figure S4** Phylogenetic tree of Arabidopsis and *N. benthamiana* SCPLs.

Maximum likelihood phylogeny of serine carboxypeptidase-like (SCPL) protein sequences from *N. benthamiana* and *A. thaliana*. Branch support values were calculated using ultrafast bootstrap with 1000 replications. The phylogenetic tree was visualised using iTOL and displayed with midpoint rooting.

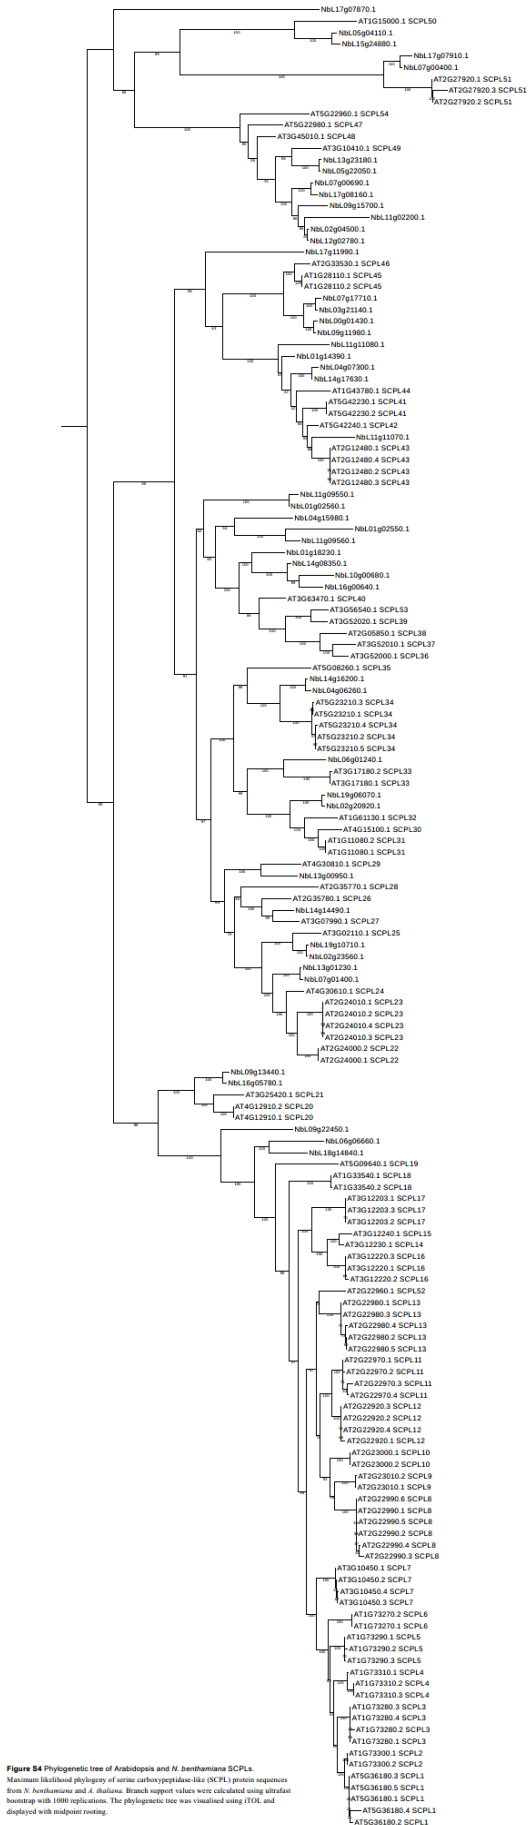



**Figure S6** Phylogenetic tree of *Arabidopsis* and *N. benthamiana* PMEs.

Maximum likelihood phylogeny of pectin methylesterase (PME) protein sequences from *N. benthamiana* and *A. thaliana*. Branch support values were calculated using ultrafast bootstrap with 1000 replications. The phylogenetic tree was visualised using iTOL and displayed with midpoint rooting.

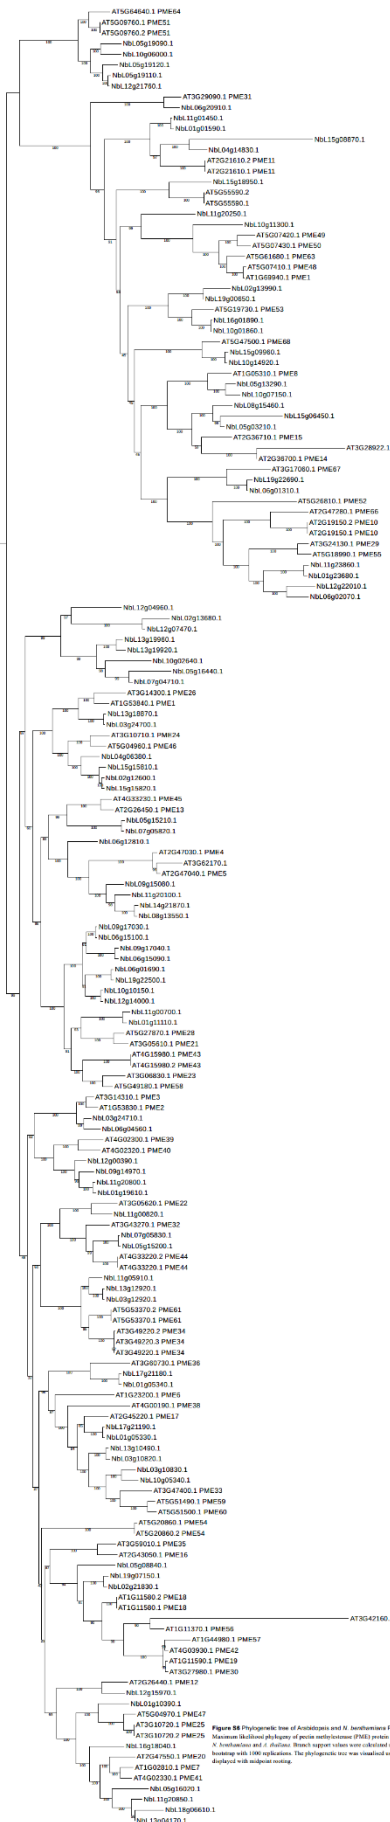

**Figure S6** Phylogenetic tree of *Arabidopsis* and *N. benthamiana* PMEs. Maximum likelihood phylogeny of pectin methylesterase (PME) protein sequences from *A. thaliana* and *N. benthamiana*. Branch support values were calculated using ultrafast bootstrap with 1000 replications. The phylogenetic tree was visualised using iTOL and displayed with midpoint rooting.

```

cNbL12g00390 . . . . . YPKWLKKKDRTLLQ . APINQIKFDLVVAKDGSNGFRTINEALSTAPNSS . STRFV
cNbL03g24710 . . . . . WPEWLSAGDRRLLQ . S . . STVRPDVVVAADGSGNFKTVSEAVARAPEKS . SKRYV
cNbL13g12920 D . . . . . FPKWLSRRDRKLLN . KSVSTIQADIIVAKDGSSTVKTIAEAIKKVPEKS . NRRTI
cNbL11g05910 EDFAPFPKWLNRKERVLLD . TPVSAIHADIIVSKDNGTFKTIAEAIKKVPQYS . NRRII
cNbL05g08840 . . . . . MPSWVNSRDRKLLE . SPAEDIKANAVVAQDGSQDYQTLTEAVAAAPDKS . KTRYV
cNbL02g21830 . . . . . LPTWV . . . DRRLLQ . LSANAIKANVIVAKDGSQYKTVKEAVASAPDNS . KTRYV
cNbL03g24700 . . . . . YPEWVRPGDRRLLQ . A . . VNPKPDVTVASDGTRDVLTIQEAVKRVPKKS . KVRFV
cNbL05g15200 . . . . . FFFWLNRKDRRLLQLTPSTGVVADVVVALDGTGNFTRIKDAISAAPQLS . TKRFV
uNbL05g19120 . . . . . WEGSGSDGPCHDIKGGVPSGLKPDVTVCKEGGCDYKIVQEAVNAAPDNGLTRKFV
uNbL12g21760 . . . . . WEGSGS . GESGQAKVGVPSGLKPDVTVCKEGGCNYKTVQEAVNAAPDNEVTRKFV
uNbL05g19090 . . . . . WEPGSVSG . . FEFKGGFPSGLDPNVTVCKEGGCDYKMVQEAVNATPDNLGPGKFV
uNbL01g19610 . . . . . FPKWLKKRDRALLQ . ATINETEIDLVVAKDGSNGFSTINEALSAAPNAS . RTRFV

```

**Figure S7** Alignment of the linker region of PMEs. Shown are eight cleaved PMEs (c, red annotation) and four uncleaved PMEs (u, blue annotation). The putative cleavage motif is highlighted in red.

**Figure S8** Phylogenetic tree of Arabidopsis and *N. benthamiana* GELPs.

Maximum likelihood phylogeny of GDSL-like lipase/acylhydrolase (GELP) protein sequences from *N. benthamiana* and *A. thaliana*. Branch support values were calculated using ultrafast bootstrap with 1000 replications. The phylogenetic tree was visualised using iTOL and displayed with midpoint rooting.

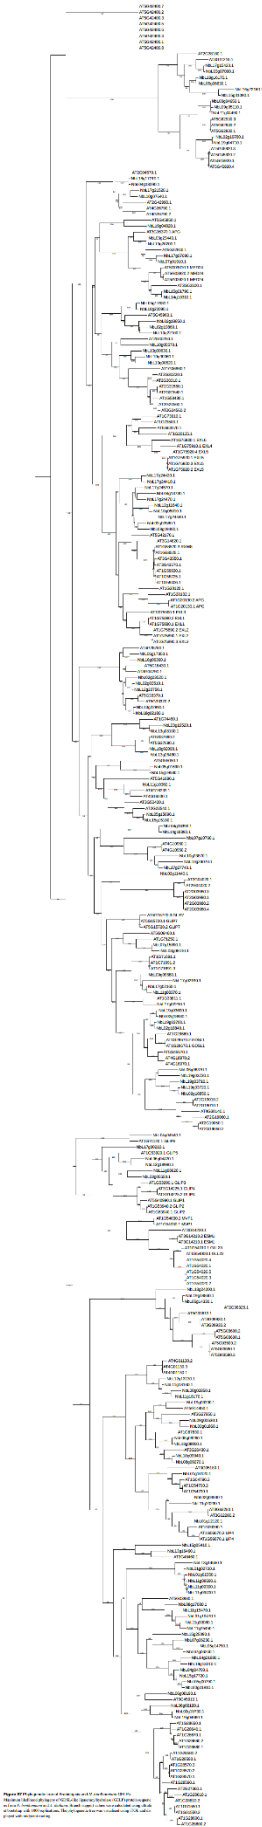



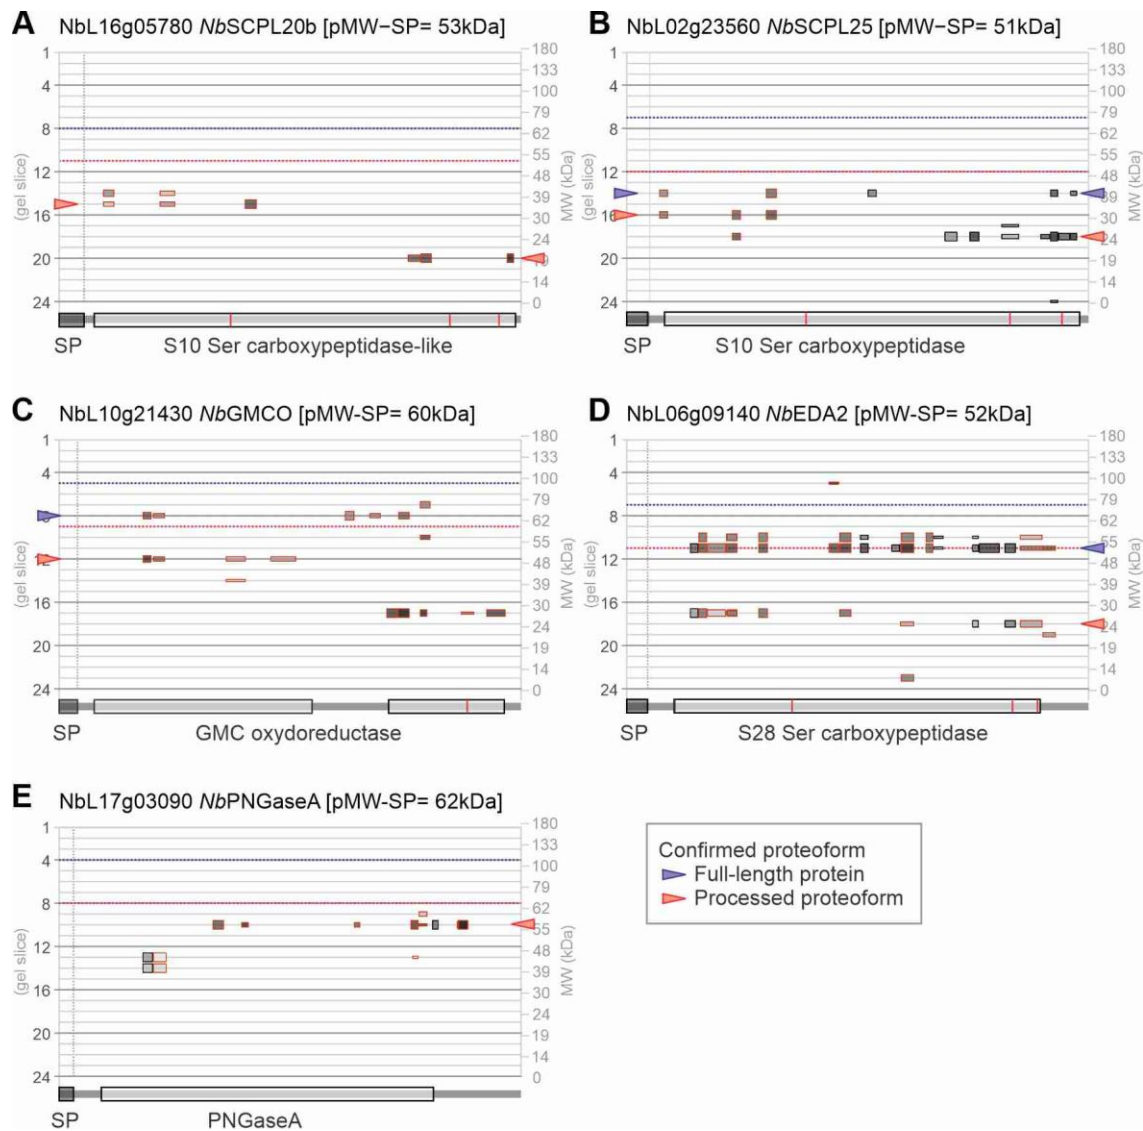

**Figure S9** Peptographs of five processed proteins confirmed by double tagging.

Highlighted with arrowheads are the proteoforms that were detected *in vivo* with double-tagged constructs.

**Table S1** Used plasmids

| Plasmid | Description*                 | Reference                |
|---------|------------------------------|--------------------------|
| pJK001c | Backbone for pKZ45           | Paulus et al., 2020      |
| pJK497  | Binary empty vector          | Kourelis et al., 2020    |
| pJK497  | Template for 2x35S-SP-intron | Kourelis et al., 2020    |
| pPJ057  | Template for FLAG-RFP        | Beritza et al., in prep. |
| pJK227  | Template for GFP-terminator  | Kourelis et al., 2020    |
| pKZ45   | Binary 35S: SP-FR-HG         | This work                |
| pKZ47   | Binary 35S: SP-FR-SCPL25-HG  | This work                |
| pKZ49   | Binary 35S: SP-FR-EDA2-HG    | This work                |
| pKZ54   | Binary 35S: SP-FR-GMC-HG     | This work                |
| pKZ60   | Binary 35s: SP-FR-PNGaseA-HG | This work                |
| pKZ67   | Binary 35S: SP-FR-SCPL20b-HG | This work                |

\*, SP, PR1a Signal Peptide; FR, FLAG-RFP; HG, 2xHis-GFP.

**Kourelis J, Malik S, Mattinson O, Krauter S, Kahlon PS, Paulus JK, van der Hoorn RAL.** (2020) Evolution of a guarded decoy protease and its receptor in solanaceous plants. *Nat Commun.* **11**, 4393.

**Paulus JK, Kourelis J, Ramasubramanian S, Homma F, Godson A, Hörger AC, Hong TN, Krahn D, Ossorio Carballo L, Wang S, Win J, Smoker M, Kamoun S, Dong S, van der Hoorn RAL.** (2020) Extracellular proteolytic cascade in tomato activates immune protease Rcr3. *Proc. Natl. Acad. Sci. USA.* **117**, 17409-17417.

**Table S2** Used oligonucleotides

| <b>Name</b>        | <b>Sequence (5' – 3')</b>                                                                   |
|--------------------|---------------------------------------------------------------------------------------------|
| SPintron-EcoRI-F1  | CAAGAattcGGATCCGGAGGTCAACATGGTGGAGCAC                                                       |
| 2x35S-SPi-SalI-R1  | CAAgtcgacCTGCACATCAACAAATTTTGGTCATATATTAG                                                   |
| FLAGRFP-SalI-F1    | CAAgtcgacGAATGGATTACAAGGATGACGACGATAAGGAGCCGGGATGGCCT<br>CCTCCGAGGAC                        |
| FLAGRFP-KpnI-R1    | CAAgttaccACTAGTCTTAAGGGCGCCGGTGGAGTGGCGGCC                                                  |
| HisGFPterm-KpnI-F1 | CAAgttaccCCCGGTCTAGAACGCGTCATCACCATCACCATCACCATCACCATC<br>ACCATCACCTGCAGATGGTGAGCAAGGGCGAGG |
| HisGFPterm-PvuI-R2 | CAAcgatcgACTCTAGCTAGAGAAGCTGATCAATGCATC                                                     |
| SCPL25-AflIII-F1   | CAActtaagACCAATTACAAGGAAGAAGAAGAAGCTG                                                       |
| SCPL25-XbaI-R1     | CAAtctagaTGACTTGGGAAGTGGCTCTC                                                               |
| EDA2-KpnI-F1       | CAAgttaccATCTCAACTTCTCATCTTCTTCTTCAG                                                        |
| EDA2-XbaI-R1       | CAAtctagaTACATCTGAAACCTGGCACTG                                                              |
| GMC-AflIII-F2      | CAActtaagGAAAAAGCTCCAAACTACTCATT                                                            |
| GMC-KpnI-R1        | CAAgttaccATTAATATGACTCTTCTCTTTTGCAAG                                                        |
| PNGaseA-AflIII-F1  | CAActtaagCTTGAACACCATTCCCACTTC                                                              |
| PNGaseA-KpnI-R1    | CAAgttaccCAAAGCAGAAAACGAATCAAACCTTC                                                         |
| SCPL20b-AflIII-F1  | CAActtaagGTACCTGAAAATGCATTAATTACTCAAATTCCTG                                                 |
| SCPL20b-XbaI-R1    | CAAtctagaTATGTTCTTGCCCTCTAGCCAG                                                             |

Restrictions sites for restriction enzymes indicated in the primer name are printed in small case.
